# Supplementary material for: Whole Exome Sequencing Reveals Homozygous Mutations in RAI1, OTOF, and SLC26A4 Genes Associated with Nonsyndromic Hearing Loss in Altaian Families (South Siberia)
Source: PubMed Central journal article supplement (PMC4833413; doi:10.1371/journal.pone.0153841), 2016-04-15
Supplement: pone.0153841.s004.pdf [file pone.0153841.s004.pdf]

**S1 Table. Patients with HL from four Altaian families (F38, F40, F53, F54) analyzed by WES.**

| <b>Family and patient code</b> | <b>Hearing status</b>                            | <b>Year of birth</b> | <b>Sex</b> | <b>Ethnicity</b> |
|--------------------------------|--------------------------------------------------|----------------------|------------|------------------|
| <b>F38:</b>                    |                                                  |                      |            |                  |
| 38-II-4                        | congenital profound sensorineural HL             | 1964                 | female     | Altaian          |
| 38-II-5                        | congenital profound sensorineural HL             | 1966                 | male       | Altaian          |
| <b>F40:</b>                    |                                                  |                      |            |                  |
| 40-II-1                        | profound mixed (sensorineural and conductive) HL | 1960                 | female     | Altaian          |
| 40-II-3                        | congenital profound sensorineural HL             | 1979                 | female     | Altaian          |
| <b>F53:</b>                    |                                                  |                      |            |                  |
| 53-II-1                        | congenital profound sensorineural HL             | 1988                 | male       | Altaian          |
| <b>F54:</b>                    |                                                  |                      |            |                  |
| 54-II-2                        | congenital profound sensorineural HL             | 1975                 | female     | Altaian          |
| 54-II-5                        | congenital profound sensorineural HL             | 1982                 | female     | Altaian          |

HL- hearing loss; WES – whole exome sequencing.
