# Supplementary material for: Whole Exome Sequencing Reveals Homozygous Mutations in RAI1, OTOF, and SLC26A4 Genes Associated with Nonsyndromic Hearing Loss in Altaian Families (South Siberia)
Source: PubMed Central journal article supplement (PMC4833413; doi:10.1371/journal.pone.0153841), 2016-04-15
Supplement: pone.0153841.s005.pdf [file pone.0153841.s005.pdf]

**S2 Table. Primers for PCR / Sanger sequencing.**

| <b>Mutation</b>              | <b>Primers</b>                                                              | <b>Product size</b> |
|------------------------------|-----------------------------------------------------------------------------|---------------------|
| c.5254G>A ( <i>RAI1</i> )    | RAI-U: 5'-TCCTTGCCCCTCTCCTCCAC-3'<br>RAI-L: 5'-GCCTCCTTGCTGCACTCATGTTT-3'   | 446                 |
| c.1111C>G ( <i>OTOF</i> )    | OTOF-U: 5'-CGGAAGAGTGGGGCTGCTTG-3'<br>OTOF-L: 5'-CTCTAGGGACCAAGACAGCATTT-3' | 417                 |
| c.2168A>G ( <i>SLC26A4</i> ) | Ex19_F: 5'-CGTGATCGTCCACAAG-3'<br>Ex19_R: 5'-GGGTACTACCAGGTAATTT-3'         | 754                 |
