# Supplementary material for: Whole Exome Sequencing Reveals Homozygous Mutations in RAI1, OTOF, and SLC26A4 Genes Associated with Nonsyndromic Hearing Loss in Altaian Families (South Siberia)
Source: PubMed Central journal article supplement (PMC4833413; doi:10.1371/journal.pone.0153841), 2016-04-15
Supplement: pone.0153841.s006.pdf [file pone.0153841.s006.pdf]

**S3 Table. The *RAI1* genotypes with allelic variations detected by Sanger sequencing in individuals homozygous and heterozygous for c.5254G>A.**

| Code                                                 | Hearing status | Genotypes                           |                                       |                                                                                                                                     |                                       |                                       | Allele                                                                                               |
|------------------------------------------------------|----------------|-------------------------------------|---------------------------------------|-------------------------------------------------------------------------------------------------------------------------------------|---------------------------------------|---------------------------------------|------------------------------------------------------------------------------------------------------|
|                                                      |                | rs3803763<br>c.269G>C<br>p.Gly90Ala | rs11649804<br>c.493C>A<br>p.Pro165Thr | Variations in polyQ region *                                                                                                        | rs8067439<br>c.1992G>A<br>p.Pro664Pro | Mutation<br>c.5254G>A<br>p.Gly1752Arg |                                                                                                      |
| <b>Homozygotes for c.5254G&gt;A</b>                  |                |                                     |                                       |                                                                                                                                     |                                       |                                       |                                                                                                      |
| 38-II-5                                              | HL             | C/C                                 | A/A                                   | Q <sub>13</sub> [CAG CAA (CAG) <sub>10</sub> del(CAG) CAA] / Q <sub>13</sub> [CAG CAA (CAG) <sub>10</sub> del(CAG) CAA]             | G/G                                   | A/A                                   | Allele <sub>mut</sub> : C-A-Q <sub>13</sub> [CAG CAA (CAG) <sub>10</sub> del(CAG) CAA]-G-A           |
|                                                      |                |                                     |                                       |                                                                                                                                     |                                       |                                       | Allele <sub>mut</sub> : C-A-Q <sub>13</sub> [CAG CAA (CAG) <sub>10</sub> del(CAG) CAA]-G-A           |
| 40-II-1                                              | HL             | C/C                                 | A/A                                   | Q <sub>13</sub> [CAG CAA (CAG) <sub>10</sub> del(CAG) CAA] / Q <sub>13</sub> [CAG CAA (CAG) <sub>10</sub> del(CAG) CAA]             | G/G                                   | A/A                                   | Allele <sub>mut</sub> : C-A-Q <sub>13</sub> [CAG CAA (CAG) <sub>10</sub> del(CAG) CAA]-G-A           |
|                                                      |                |                                     |                                       |                                                                                                                                     |                                       |                                       | Allele <sub>mut</sub> : C-A-Q <sub>13</sub> [CAG CAA (CAG) <sub>10</sub> del(CAG) CAA]-G-A           |
| 42-II-1                                              | HL             | C/C                                 | A/A                                   | Q <sub>13</sub> [CAG CAA (CAG) <sub>10</sub> del(CAG) CAA] / Q <sub>13</sub> [CAG CAA (CAG) <sub>10</sub> del(CAG) CAA]             | G/G                                   | A/A                                   | Allele <sub>mut</sub> : C-A-Q <sub>13</sub> [CAG CAA (CAG) <sub>10</sub> del(CAG) CAA]-G-A           |
|                                                      |                |                                     |                                       |                                                                                                                                     |                                       |                                       | Allele <sub>mut</sub> : C-A-Q <sub>13</sub> [CAG CAA (CAG) <sub>10</sub> del(CAG) CAA]-G-A           |
| 43-III-1                                             | HL             | C/C                                 | A/A                                   | Q <sub>13</sub> [CAG CAA (CAG) <sub>10</sub> del(CAG) CAA] / Q <sub>13</sub> [CAG CAA (CAG) <sub>10</sub> del(CAG) CAA]             | G/G                                   | A/A                                   | Allele <sub>mut</sub> : C-A-Q <sub>13</sub> [CAG CAA (CAG) <sub>10</sub> del(CAG) CAA]-G-A           |
|                                                      |                |                                     |                                       |                                                                                                                                     |                                       |                                       | Allele <sub>mut</sub> : C-A-Q <sub>13</sub> [CAG CAA (CAG) <sub>10</sub> del(CAG) CAA]-G-A           |
| <b>Affected heterozygotes for c.5254G&gt;A</b>       |                |                                     |                                       |                                                                                                                                     |                                       |                                       |                                                                                                      |
| 18-II-1                                              | HL             | G/C                                 | C/A                                   | Q <sub>13</sub> [CAG CAA (CAG) <sub>10</sub> del(CAG) CAA] / Q <sub>14</sub> [CAG CAG (CAG) <sub>11</sub> CAA]                      | G/A                                   | G/A                                   | Allele <sub>mut</sub> : C-A-Q <sub>13</sub> [CAG CAA (CAG) <sub>10</sub> del(CAG) CAA]-G-A           |
|                                                      |                |                                     |                                       |                                                                                                                                     |                                       |                                       | Allele <sub>1</sub> : G-C-Q <sub>14</sub> [CAG CAG (CAG) <sub>11</sub> CAA]-A-G                      |
| 37-II-1                                              | HL             | G/C                                 | C/A                                   | Q <sub>13</sub> [CAG CAA (CAG) <sub>10</sub> del(CAG) CAA] / Q <sub>13</sub> [CAG CAG (CAG) <sub>10</sub> del(CAG) CAA]             | G/A                                   | G/A                                   | Allele <sub>mut</sub> : C-A-Q <sub>13</sub> [CAG CAA (CAG) <sub>10</sub> del(CAG) CAA]-G-A           |
|                                                      |                |                                     |                                       |                                                                                                                                     |                                       |                                       | Allele <sub>2</sub> : G-C-Q <sub>13</sub> [CAG CAG (CAG) <sub>10</sub> del(CAG) CAA]-A-G             |
| 38-I-1                                               | HL             | C/C                                 | A/A                                   | Q <sub>13</sub> [CAG CAA (CAG) <sub>10</sub> del(CAG) CAA] / Q <sub>13</sub> [CAG CAA (CAG) <sub>10</sub> del(CAG) CAA]             | G/G                                   | G/A                                   | Allele <sub>mut</sub> : C-A-Q <sub>13</sub> [CAG CAA (CAG) <sub>10</sub> del(CAG) CAA]-G-A           |
|                                                      |                |                                     |                                       |                                                                                                                                     |                                       |                                       | Allele <sub>3</sub> : C-A-Q <sub>13</sub> [CAG CAA (CAG) <sub>10</sub> del(CAG) CAA]-G-G             |
| 43-II-2                                              | HL             | C/C                                 | A/A                                   | Q <sub>13</sub> [CAG CAA (CAG) <sub>10</sub> del(CAG) CAA] / Q <sub>13</sub> [CAG CAA (CAG) <sub>10</sub> del(CAG) CAA]             | G/G                                   | G/A                                   | Allele <sub>mut</sub> : C-A-Q <sub>13</sub> [CAG CAA (CAG) <sub>10</sub> del(CAG) CAA]-G-A           |
|                                                      |                |                                     |                                       |                                                                                                                                     |                                       |                                       | Allele <sub>3</sub> : C-A-Q <sub>13</sub> [CAG CAA (CAG) <sub>10</sub> del(CAG) CAA]-G-G             |
| <b>Normal hearing heterozygotes for c.5254G&gt;A</b> |                |                                     |                                       |                                                                                                                                     |                                       |                                       |                                                                                                      |
| 37-I-2                                               | normal hearing | C/C                                 | A/A                                   | Q <sub>13</sub> [CAG CAA (CAG) <sub>10</sub> del(CAG) CAA] / Q <sub>13</sub> [CAG CAA (CAG) <sub>10</sub> del(CAG) CAA]             | G/G                                   | G/A                                   | Allele <sub>mut</sub> : C-A-Q <sub>13</sub> [CAG CAA (CAG) <sub>10</sub> del(CAG) CAA]-G-A           |
|                                                      |                |                                     |                                       |                                                                                                                                     |                                       |                                       | Allele <sub>3</sub> : C-A-Q <sub>13</sub> [CAG CAA (CAG) <sub>10</sub> del(CAG) CAA]-G-G             |
| 43-II-3                                              | normal hearing | C/C                                 | A/A                                   | Q <sub>13</sub> [CAG CAA (CAG) <sub>10</sub> del(CAG) CAA] / Q <sub>13</sub> [CAG CAA (CAG) <sub>10</sub> del(CAG) CAA]             | G/G                                   | G/A                                   | Allele <sub>mut</sub> : C-A-Q <sub>13</sub> [CAG CAA (CAG) <sub>10</sub> del(CAG) CAA]-G-A           |
|                                                      |                |                                     |                                       |                                                                                                                                     |                                       |                                       | Allele <sub>3</sub> : C-A-Q <sub>13</sub> [CAG CAA (CAG) <sub>10</sub> del(CAG) CAA]-G-G             |
| 38-II-1                                              | normal hearing | C/C                                 | A/A                                   | Q <sub>13</sub> [CAG CAA (CAG) <sub>10</sub> del(CAG) CAA] / Q <sub>13</sub> [CAG CAA (CAG) <sub>10</sub> del(CAG) CAA]             | G/G                                   | G/A                                   | Allele <sub>mut</sub> : C-A-Q <sub>13</sub> [CAG CAA (CAG) <sub>10</sub> del(CAG) CAA]-G-A           |
|                                                      |                |                                     |                                       |                                                                                                                                     |                                       |                                       | Allele <sub>3</sub> : C-A-Q <sub>13</sub> [CAG CAA (CAG) <sub>10</sub> del(CAG) CAA]-G-G             |
| Alt-1                                                | normal hearing | C/C                                 | A/A                                   | Q <sub>13</sub> [CAG CAA (CAG) <sub>10</sub> del(CAG) CAA] / Q <sub>13</sub> [CAG CAA (CAG) <sub>10</sub> del(CAG) CAA]             | G/G                                   | G/A                                   | Allele <sub>mut</sub> : C-A-Q <sub>13</sub> [CAG CAA (CAG) <sub>10</sub> del(CAG) CAA]-G-A           |
|                                                      |                |                                     |                                       |                                                                                                                                     |                                       |                                       | Allele <sub>3</sub> : C-A-Q <sub>13</sub> [CAG CAA (CAG) <sub>10</sub> del(CAG) CAA]-G-G             |
| Alt-2                                                | normal hearing | C/C                                 | C/A                                   | Q <sub>13</sub> [CAG CAA (CAG) <sub>10</sub> del(CAG) CAA] / Q <sub>11</sub> [CAG CAG (CAG) <sub>8</sub> del(CAG) <sub>3</sub> CAA] | G/A                                   | G/A                                   | Allele <sub>mut</sub> : C-A-Q <sub>13</sub> [CAG CAA (CAG) <sub>10</sub> del(CAG) CAA]-G-A           |
|                                                      |                |                                     |                                       |                                                                                                                                     |                                       |                                       | Allele <sub>4</sub> : C-C-Q <sub>11</sub> [CAG CAG (CAG) <sub>8</sub> del(CAG) <sub>3</sub> CAA]-A-G |

HL – hearing loss, \* NM\_030665 ref seq.: (CAG)<sub>13</sub> CAA=Q<sub>14</sub>; variations in polyQ region (starting from 832 nucleotide position) includes rs11078398: c.837G>A (caG/caA) p.Gln279Gln; codon deletions: del(CAG) and del(CAG)<sub>3</sub>. The common haplotype for c.5254G>A (allele<sub>mut</sub>) is highlighted by yellow, allele<sub>1</sub>, allele<sub>2</sub>, allele<sub>3</sub>, and allele<sub>4</sub> - by grey, pink, blue, and green, respectively. Nucleotides embedded in common haplotype for c.5254G>A (allele<sub>mut</sub>) are shown by red.
