# Supplementary material for: Whole Exome Sequencing Reveals Homozygous Mutations in RAI1, OTOF, and SLC26A4 Genes Associated with Nonsyndromic Hearing Loss in Altaian Families (South Siberia)
Source: PubMed Central journal article supplement (PMC4833413; doi:10.1371/journal.pone.0153841), 2016-04-15
Supplement: pone.0153841.s007.pdf [file pone.0153841.s007.pdf]

**S4 Table. Mutations identified in the *RAI1* gene in the SMS patients without any 17p11.2 deletions (literature data) and in patients with isolated HL (this study).**

| Nucleotide change                                 | Mutation type | Amino acid change              | (CAG)-repeats at 832 nucleotide position       | Familial or <i>de novo</i>     | Number (code) of patients       | Common SMS clinical symptoms / Hearing status | References   |
|---------------------------------------------------|---------------|--------------------------------|------------------------------------------------|--------------------------------|---------------------------------|-----------------------------------------------|--------------|
| <b>N-terminal part of the RAI1 protein</b>        |               |                                |                                                |                                |                                 |                                               |              |
| c.238C>T                                          | nonsense      | p.Arg80*                       | (CAG) <sub>13-14</sub>                         | no data                        | 1 (RNS78)                       | + / normal hearing                            | [1]          |
| c.253del19                                        | frameshift    | p.Leu85fsX60                   | (CAG) <sub>13</sub> /(CAG) <sub>13</sub>       | <i>de novo</i>                 | 1 (SMS153)                      | + / normal hearing                            | [2]          |
| c.518_519insG                                     | frameshift    | p.Gln174Profs*64               | (CAG) <sub>13-14</sub>                         | no data                        | 1 (RNS103)                      | + / normal hearing                            | [1]          |
| c.548delT                                         | frameshift    | p.L183RfsX69                   | (CAG) <sub>14</sub> /(CAG) <sub>14</sub>       | <i>de novo</i>                 | 1 (M2911)                       | + / HL                                        | [3]          |
| c.707A>T                                          | missense      | p.Y236F                        | (CAG) <sub>14</sub> /(CAG) <sub>14</sub>       | familial                       | 1 (M2732)                       | + / normal hearing                            | [3]          |
| c.725C>T and c.2907C>T <sup>a</sup>               | missense      | p.P242L and p.D969D            | (CAG) <sub>13</sub> /(CAG) <sub>13</sub>       | unclassified                   | 1 (M2543)                       | + / no data                                   | [3]          |
| c.1119delC                                        | frameshift    | p.Ser373fsX65                  | NA                                             | <i>de novo</i>                 | 1 (SMS201)                      | + / normal hearing                            | [4]          |
| c.1297C>T                                         | nonsense      | p.Gln433*                      | (CAG) <sub>13-14</sub>                         | no data                        | 1 (RNS105)                      | + / normal hearing                            | [1]          |
| c.1449delC (c.1308delC)                           | frameshift    | p.E484KfsX35                   | (CAG) <sub>14</sub> /(CAG) <sub>14</sub>       | <i>de novo</i>                 | 1 (M2377=SMS159)                | + / HL                                        | [3,5]        |
| c.1500G>A <sup>a</sup> and c.3791A>G (rs61746214) | missense      | p.P500P and p.E1264G           | (CAG) <sub>14</sub> /(CAG) <sub>14</sub>       | familial                       | 1 (M2900)                       | + / normal hearing                            | [3]          |
| c.1973G>A                                         | nonsense      | W658X                          | (CAG) <sub>13</sub> /(CAG) <sub>13</sub>       | <i>de novo</i>                 | 1 (M2719)                       | + / HL                                        | [3]          |
| c.2273G>A                                         | nonsense      | p.W758X                        | NA                                             | <i>de novo</i>                 | 1 (patient 1)                   | + / no data                                   | [6]          |
| c.2396dupC                                        | frameshift    | p.Gly800Trpfs*36               | (CAG) <sub>13-14</sub>                         | no data                        | 1 (RNS165)                      | + / normal hearing                            | [1]          |
| c.2643delC                                        | frameshift    | p.Glu882Serfs*68               | (CAG) <sub>13-14</sub>                         | no data                        | 1 (RNS86)                       | + / normal hearing                            | [1]          |
| c.2763_2779dup17                                  | frameshift    | p.Leu927Glnfs*29               | (CAG) <sub>13-14</sub>                         | no data                        | 1 (RNS131)                      | + / normal hearing                            | [1]          |
| c.2773del29                                       | frameshift    | p.Val925fsX8                   | (CAG) <sub>13</sub> /(CAG) <sub>13</sub>       | <i>de novo</i>                 | 1 (SMS129=BAB539)               | + / normal hearing                            | [5,7]        |
| c.2836_2837delCT                                  | frameshift    | p.Leu946Valfs*7                | (CAG) <sub>13-14</sub>                         | no data                        | 1 (RNS208)                      | + / normal hearing                            | [1]          |
| c.2869_2870insGG                                  | frameshift    | p.Asp957Glyfs*108              | (CAG) <sub>13-14</sub>                         | no data                        | 1 (RNS101)                      | + / normal hearing                            | [1]          |
| c.2878C>T                                         | nonsense      | p.Arg960X                      | (CAG) <sub>10</sub> /(CAG) <sub>11</sub>       | no data                        | 1 (BAB1106)                     | + / normal hearing                            | [7]          |
| c.3103delC                                        | frameshift    | p.Gln1035fsX28                 | (CAG) <sub>10</sub> /(CAG) <sub>10</sub><br>NA | <i>de novo</i><br>unclassified | 1 (BAB2416)<br>1 (SMS324)       | + / normal hearing<br>+ / HL                  | [8]<br>[9]   |
| c.3103insC                                        | frameshift    | p.Q1034PfsX31 (p.Gln1035fsX30) | (CAG) <sub>10</sub> /(CAG) <sub>11</sub><br>NA | <i>de novo</i><br>unclassified | 1 (M2754=BAB1852)<br>1 (SMS335) | + / HL<br>+ / HL                              | [3,7]<br>[9] |

**S4 Table. Mutations identified in the *RAII* gene in the SMS patients without any 17p11.2 deletions (literature data) and in patients with isolated HL (this study).**

(continued)

| Nucleotide change                                 | Mutation type | Amino acid change     | (CAG)-repeats at 832 nucleotide position | Familial or <i>de novo</i> | Number (code) of patients               | Common SMS clinical symptoms / Hearing status | References        |
|---------------------------------------------------|---------------|-----------------------|------------------------------------------|----------------------------|-----------------------------------------|-----------------------------------------------|-------------------|
| <b>C-terminal part of the <i>RAII</i> protein</b> |               |                       |                                          |                            |                                         |                                               |                   |
| c.3183G>A <sup>a</sup> and c.5653G>A <sup>b</sup> | missense      | p.T1061T and p.D1885N | (CAG) <sub>13</sub> /(CAG) <sub>13</sub> | familial                   | 1 (M2365)                               | + / HL                                        | [3]               |
| c.3208G>A and c.4512G>T <sup>a</sup>              | missense      | p.G1070R and p.L1504L | (CAG) <sub>14</sub> /(CAG) <sub>14</sub> | familial                   | 1 (M2826)                               | + / HL                                        | [3]               |
| c.3386dupA                                        | frameshift    | p.Glu1130Glyfs*36     | (CAG) <sub>13-14</sub>                   | <i>de novo</i>             | 1 (RNS59)                               | + / normal hearing                            | [1]               |
| c.3634A>G                                         | missense      | p.Ser1212Gly          | (CAG) <sub>13</sub> /(CAG) <sub>18</sub> | familial                   | 1 (BAB2330)                             | + / normal hearing                            | [8]               |
| c.3650G>A                                         | missense      | R1217Q                | NA                                       | unclassified               | 1 (SAG4739)                             | + / no data                                   | [10]              |
| c.3781_3783delGAG                                 | frameshift    | p.del1261E            | (CAG) <sub>14</sub> /(CAG) <sub>14</sub> | familial                   | 1 (M2867)                               | + / normal hearing                            | [3]               |
| c.3801delC                                        | frameshift    | p.Pro1267fsX46        | (CAG) <sub>10</sub> /(CAG) <sub>11</sub> | <i>de novo</i>             | 1 (SMS188)                              | + / normal hearing                            | [2]               |
| c.4166A>G                                         | missense      | Q1389R                | NA                                       | unclassified               | 1 (SAG6888)                             | + / no data                                   | [10]              |
| c.4649delC                                        | frameshift    | p.Ser1550fsX36        | NA                                       | <i>de novo</i>             | 1 (SMS278)                              | + / normal hearing                            | [4]               |
| c.4685A>G                                         | missense      | p.Gln1562Arg          | (CAG) <sub>9</sub> /(CAG) <sub>11</sub>  | <i>de novo</i>             | 1 (SMS175)                              | + / normal hearing                            | [2]               |
| c.4933delGCCG                                     | frameshift    | p.Ala1645fsX35        | NA                                       | <i>de novo</i>             | 1 (SMS300)                              | + / normal hearing                            | [4]               |
| <b>c.5254G&gt;A</b>                               | missense      | <b>p.Gly1752Arg</b>   | (CAG) <sub>13</sub> /(CAG) <sub>13</sub> | familial                   | 14 (10 homozygotes and 4 heterozygotes) | - / HL                                        | <b>this study</b> |
| c.5265delC (c.4929delC)                           | frameshift    | p.Pro1755fsX74        | (CAG) <sub>10</sub> /(CAG) <sub>11</sub> | <i>de novo</i>             | 1 (SMS156=BAB526)                       | + / HL                                        | [5,7]             |
| c.5423G>A                                         | missense      | p.Ser1808Asn          | (CAG) <sub>10</sub> /(CAG) <sub>11</sub> | unclassified               | 1 (SMS195)                              | + / normal hearing                            | [2]               |

HL – hearing loss. <sup>a</sup> - these silent variants are probably not related to the phenotype SMS <sup>3</sup>; <sup>b</sup> - variant in exon 4; NA – not analyzed

## References for S4 Table

1. Dubourg C, Bonnet-Brilhault F, Toutain A, Mignot C, Jacquette A, Dieux A, et al. Identification of Nine New RAI1-Truncating Mutations in Smith-Magenis Syndrome Patients without 17p11.2 Deletions. *Mol Syndromol*. 2014; 5(2): 57-64. doi: 10.1159/000357359
2. Girirajan S, Elsas LJ 2nd, Devriendt K, Elsea SH. RAI1 variations in Smith-Magenis syndrome patients without 17p11.2 deletions. *J Med Genet*. 2005;42(11): 820-828. doi: 10.1136/jmg.2005.031211
3. Vilboux T, Ciccone C, Blancato JK, Cox GF, Deshpande C, Introne WJ, et al. Molecular analysis of the Retinoic Acid Induced 1 gene (RAI1) in patients with suspected Smith-Magenis syndrome without the 17p11.2 deletion. *PLoS One*. 2011; 6(8): e22861. doi: 10.1371/journal.pone.0022861
4. Girirajan S, Vlangos CN, Szomju BB, Edelman E, Trevors CD, Dupuis L, et al. Genotype-phenotype correlation in Smith-Magenis syndrome: evidence that multiple genes in 17p11.2 contribute to the clinical spectrum. *Genet Med*. 2006; 8(7): 417-427.
5. Slager RE, Newton TL, Vlangos CN, Finucane B, Elsea SH. Mutations in RAI1 associated with Smith-Magenis syndrome. *Nat Genet*. 2003; 33(4): 466-468. doi: 10.1038/ng1126
6. Adams DR, Yuan H, Holyoak T, Arajs KH, Hakimi P, Markello TC, et al. Three rare diseases in one Sib pair: RAI1, PCK1, GRIN2B mutations associated with Smith-Magenis Syndrome, cytosolic PEPCCK deficiency and NMDA receptor glutamate insensitivity. *Mol Genet Metab*. 2014; 113(3): 161-170. doi: 10.1016/j.ymgme.2014.04.001
7. Bi W, Saifi GM, Shaw CJ, Walz K, Fonseca P, Wilson M, et al. Mutations of RAI1, a PHD-containing protein, in nondeletion patients with Smith-Magenis syndrome. *Hum Genet*. 2004; 115(6): 515-524.
8. Bi W, Saifi GM, Girirajan S, Shi X, Szomju B, Firth H, et al. RAI1 point mutations, CAG repeat variation, and SNP analysis in non-deletion Smith-Magenis syndrome. *Am J Med Genet A*. 2006; 140(22): 2454-2463. doi: 10.1002/ajmg.a.31510
9. Truong HT, Dudding T, Blanchard CL, Elsea SH. Frameshift mutation hotspot identified in Smith-Magenis syndrome: case report and review of literature. *BMC Med Genet*. 2010; 11: 142. doi: 10.1186/1471-2350-11-142
10. Vieira GH, Rodriguez JD, Carmona-Mora P, Cao L, Gamba BF, Carvalho DR, et al. Detection of classical 17p11.2 deletions, an atypical deletion and RAI1 alterations in patients with features suggestive of Smith-Magenis syndrome. *Eur J Hum Genet*. 2012; 20(2): 148-154. doi: 10.1038/ejhg.2011.167
